# Supplementary material
Source: PubMed Central journal article supplement (PMC1937549)
Supplement: pnas_0704061104_2.pdf [file pnas_0704061104_2.pdf]

GAATTCCTCCAATGAAAGATTGTGTATGGCAAATGTGTGTTTAAGAGGACATTTCTTCAG  
EcoRI

TCAGGAGGAACAGATGCCATGTGCATGTCTTCATTTGGCTCTGGTCCTTCGACATGCTGA

AGGCTTTTGCTATTGCGCACAAAGGTGTGAATCCAATCAGGCAGGATTGAGGTATTAGGAG

AGG**ATGCAAAC**AAGAAATAGTGTTAACAGCTTGTGAGGGCCTTTTTGCGCCTGTAATGG  
Oct-1

ATCATCGCAAGCTACTTGTGGCTGGAAATCCTCCTTGAAGGGGTTGACACACTTCAGAGA

TGT**TAATCT**GACAGACGGGACAGGCCTCTTCCTGTTTGTCCACACCTAATGTCCTGCTTA  
OTX

AGCTCACAAATCATTGTCTTTAACCATGACCTTTAAAAAAGTCATATAACATATACTCT

GCATATAATAAGAGTTATATTTTTGTAGATTG**ATGCAAAA**GACAACCTCAGTGTGTTGAT  
Oct-1

GTATGACACTTTTTACATTTTGTAAGAGCTC  
SacI
