# Supplementary material
Source: PubMed Central journal article supplement (PMC1937549)

**a** *RH2-2/GFP-PAC*

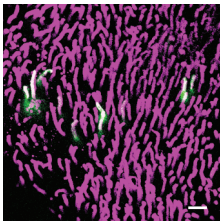

**b** *RH2-3/GFP-PAC*

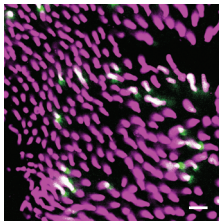

**c** *RH2-4/GFP-PAC*

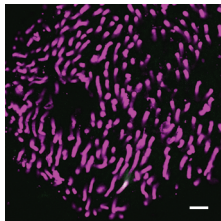

**d** Tg(*RH2-2/GFP-PAC*)

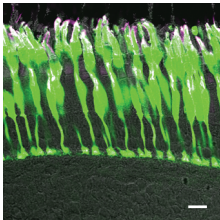

**e** Tg(*RH2-3/GFP-PAC*)

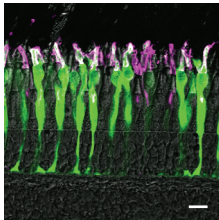

**f** Tg(*RH2-4/GFP-PAC*)

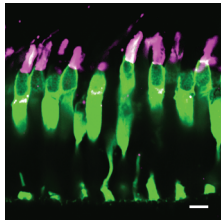

Supplement: pnas_0704061104_1.pdf [file pnas_0704061104_1.pdf]

**a** anti-blue opsin

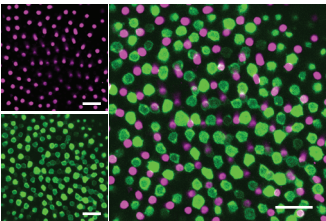

**b** anti-UV opsin

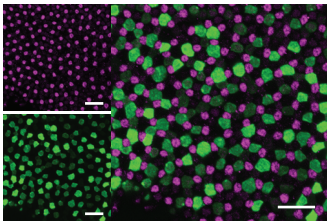

**c** anti-red opsin

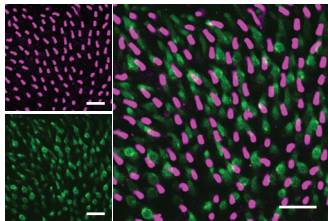

Supplement: pnas_0704061104_3.pdf [file pnas_0704061104_3.pdf]

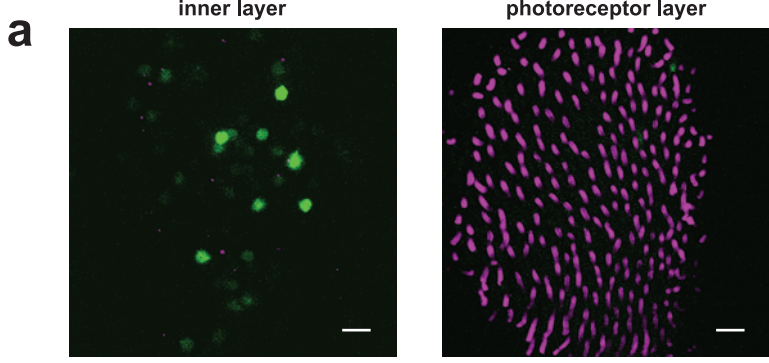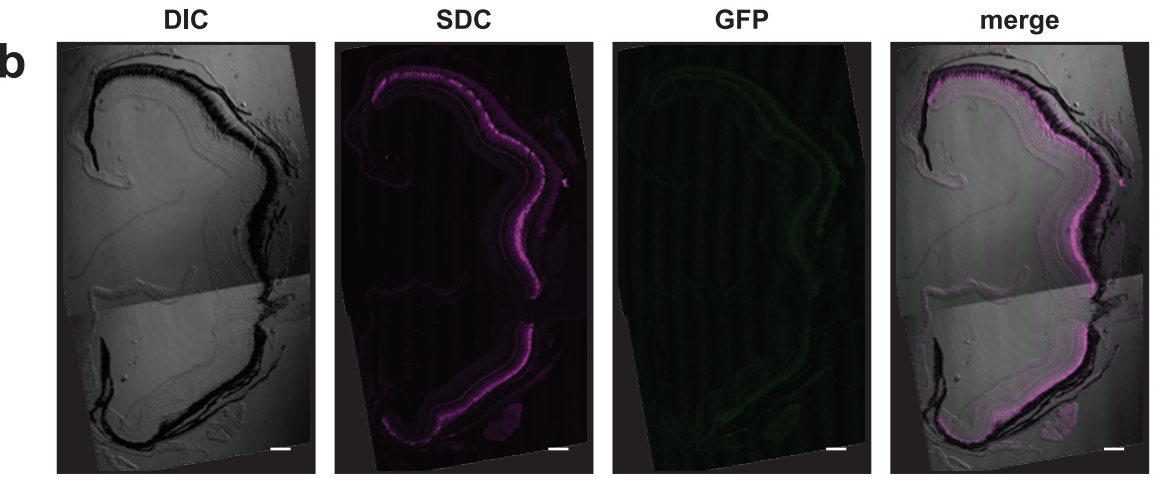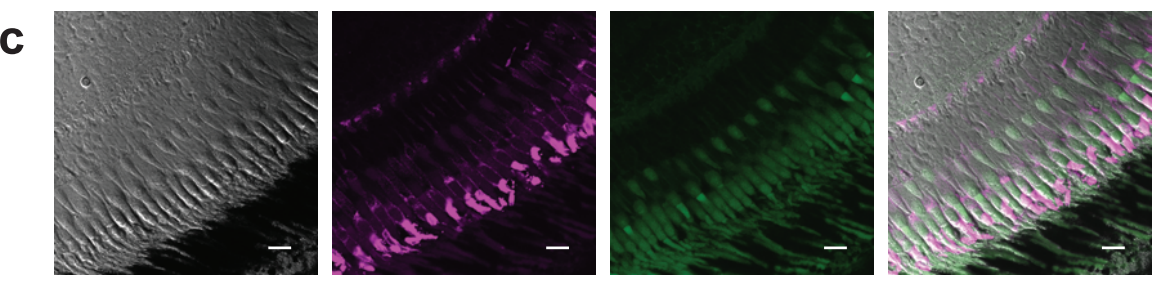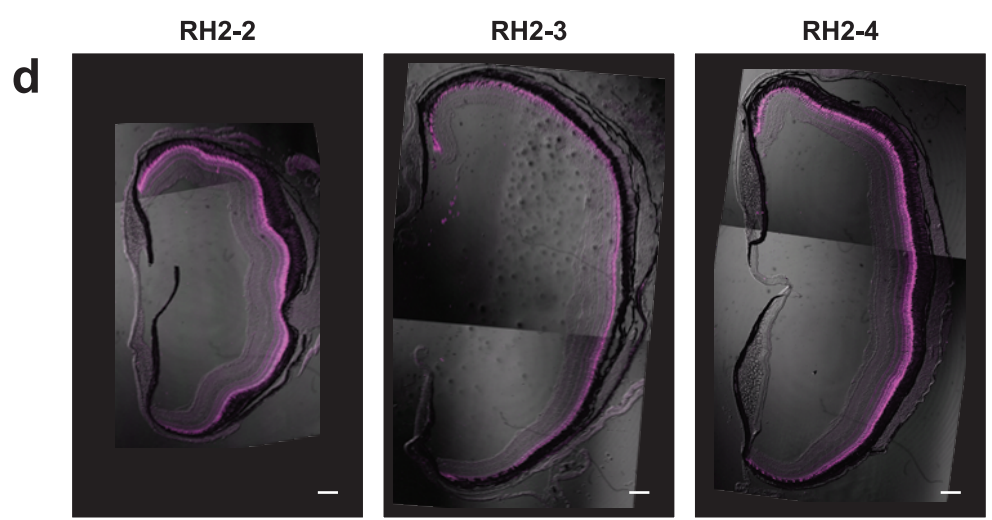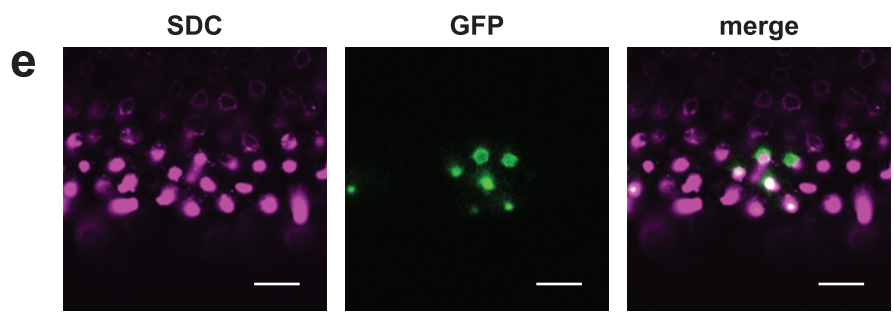

Supplement: pnas_0704061104_4.pdf [file pnas_0704061104_4.pdf]
